## EDITORIAL

## Biology Open: The story so far...

Jordan W. Raff (Editor-in-Chief *Biology Open*)\* and Rachel Hackett (Managing Editor *Biology Open*)

It is hard to believe that, with the arrival of 2015, *Biology Open* (BiO) begins its fourth year of publication. We'd like to take this moment to look back on what we have learned since the first issue was published by The Company of Biologists in January 2012.

BiO was launched with the aim of reducing the 'pain to publish' that many authors experience. By publishing all papers that address a valid scientific question, are technically sound, and where the conclusions are adequately supported by the data, BiO provides a welcoming home for solid, well-executed research papers. We have helped authors to avoid additional rounds of submission and review for papers described as "interesting, but no new mechanistic insight" or "interesting, but an insufficient advance" and saved them countless hours of additional experiments thought up by reviewers simply to increase the ever-elusive "impact" of the work. Since its launch, BiO has published more than 450 freely accessible articles.

**Turn-around time and quality of review**

One of the foremost objectives of BiO was to address the speed and quality of review. Review procedures at BiO are fast and simple, but also rigorous. We ask reviewers to complete their reviews within seven working days, and our average time for completing peer review in 2014 was nine days. Almost no articles are accepted without some changes being requested, but new experiments are only insisted upon if these are essential to support the key conclusions of the paper; we do not ask our reviewers to suggest experiments that would simply increase the impact of the work. Articles are published online on average 25 working days after acceptance.

**Reviewer fatigue**

The multiple rounds of review, revision and resubmission often required before a paper is finally accepted has led to substantial reviewer fatigue, with large numbers of reviewers often involved with the peer review process for a single article. BiO accepts articles and any accompanying reviews from the other Company of Biologists' journals. In addition, we have an agreement in place with *eLife*, the journal published by the Wellcome Trust, Howard Hughes Medical Institute and the Max Planck Society, whereby their rejected authors are given the opportunity to transfer to BiO. We are negotiating similar deals with other journals. We will also consider peer review reports from other journals. Such transfer of reviews and articles speeds up editorial decisions and reduces the number of rounds of review.

**Ethical publication**

Publishers have an increasing array of tools to help identify possible unethical practices, such as the iThenticate software,

which detects plagiarism, and processes that reveal potential figure manipulation. Recently, the increasing number of reports of 'fake' reviews, whereby authors manipulate the review process to enable them to review their own work (<http://www.nature.com/news/publishing-the-peer-review-scam-1.16400>), has led us to review our own procedures. We will ensure that any author-suggested reviewers with a non-institutional e-mail address (such as Gmail or Yahoo) are indeed valid and associated with a 'real' scientist. Would publishing peer reviews eradicate weak or non-existent peer review practices adopted by so-called predatory publishers (<http://scholarlyoa.com/publishers/>), who seem to publish anything for a fee? We continue to be actively involved in this debate with other reputable publishers.

**Recognition and reward**

Many publishers are wrangling with the issue of reviewer support, reward and incentive. Increasing numbers of articles are being published and the demand for peer review has never been greater. How is the quality of peer review to be maintained in such an environment? Are senior investigators able to dedicate their valuable time to mentoring early career scientists in the art of peer review? BiO encourages the involvement of postdocs and other early career scientists in the peer review process. We simply ask that: the name of the co-reviewer is reported to the Editor; the same rules of confidentiality and conflict of interest be applied; there is a genuine mentoring process; and the senior invited reviewer takes responsibility for the report delivered to the journal. Taking on the role of reviewer is usually not acknowledged by institutes and funders as a research output, but it is a cornerstone of the publication process. We continue to campaign with other publishers for this vital service to be properly recognized as an important academic contribution. Should reviewers be paid or is there in effect a payment in kind, an altruistic understanding that acting as a peer reviewer supports the community? This conversation will continue, with journals undertaking experiments to improve or refine the peer review process, and investigating ways to reward peer reviewers. Today, as we do every year, we take a small step in this direction by publishing the names of all those who completed a review for BiO during 2014, with our sincere thanks for their expertise and time. We hope the community will join us in thanking these people properly for their considerable effort.

Alejandro Aballay, Duke University, USA  
 Peter Aerts, University of Antwerp, Belgium  
 Kami Ahmad, Harvard Medical School, USA  
 Takahiko Akematsu, York University, Toronto, Canada  
 Scott Alper, National Jewish Health, USA  
 Jeffrey Amack, SUNY Upstate Medical University, USA  
 Enrique Amaya, University of Manchester, UK  
 Jack Arbiser, Emory University, USA  
 Maria Eugenia Arnone, Stazione Zoologica Anton Dohrn, Italy  
 Damien Arnoult, INSERM U542, France

\*Author for correspondence ([bio.editor@biologists.com](mailto:bio.editor@biologists.com))

- Kristin Artinger, University of Colorado, USA  
Jerome Artus, Pasteur Institut, France  
Sophie Astrof, Weill Medical College of Cornell University, USA  
Liliana Attisano, University of Toronto, Canada  
Peter Baas, Drexel University College of Medicine, USA  
Luis-Alberto Baena-Lopez, MRC National Institute for Medical Research, UK  
Mohan Balasubramanian, University of Warwick, UK  
Brian Ballios, University of Toronto, Canada  
Allan Balmain, University of California San Francisco, USA  
George Banting, University of Bristol, UK  
Jeffrey Barminko, Rutgers University, USA  
Mark Bass, University of Bristol, UK  
Andrew Bassett, MRC Functional Genomics Unit, University of Oxford, UK  
Aaron Baumann, Janelia Research Campus, Howard Hughes Medical Institute, USA  
Renaud Beauwens, Université libre de Bruxelles, Belgium  
Catherina Becker, University of Edinburgh, UK  
Frederic Becq, University of Poitiers, France  
Christine Bedore, Duke University, USA  
Tracy Bedrosian, Ohio State University, USA  
Frank Beier, University of Western Ontario, Canada  
Joseph Bell, Harvard Medical School, USA  
Igal Berenshtein, Ben-Gurion University of the Negev, Israel  
Andreas Bergmann, University of Massachusetts Medical School, USA  
Anne Bertolotti, MRC Laboratory of Molecular Biology, Cambridge, UK  
David Bilder, University of California Berkeley, USA  
Joyce Bischoff, Boston Children's Hospital, USA  
Jorge Blanco, Institute of Population Genetics, Vienna, Austria  
Bruce Blumberg, University of California Irvine, USA  
Rachel Bowden, Illinois State University, USA  
Douglas Bowles, University of Missouri, USA  
Andre Brandli, Ludwig-Maximilian University of Munich, Germany  
Beate Brand-Saberi, Ruhr Universität Bochum, Germany  
Björn Brembs, Universität Regensburg, Germany  
Josh Brickman, University of Edinburgh, UK  
Steven Britt, University of Colorado at Denver and Health Sciences Center, USA  
William Brownell, Baylor College of Medicine, USA  
Nia Bryant, University of York, UK  
Bradley Buckley, Portland State University, USA  
Marina Campione, CNR Institute of Neurosciences, Italy  
Dana Carroll, University of Utah, USA  
Tamara Caspary, Emory University, USA  
Kevin Chalut, University of Cambridge, UK  
Luke Chamberlain, Strathclyde University, UK  
Yu Chen, National Institutes of Health, Bethesda, USA  
Linxi Chen, University of South China, China  
Xie Jie Chen, SUNY Upstate Medical University, USA  
Danian Chen, Lunenfeld-Tanenbaum Research Institute, Mount Sinai Hospital, Toronto, Canada  
Lionel Christiaen, New York University, USA  
Christopher Ciarleglio, Brown University, USA  
Lionel Clement, University of Alabama School of Medicine, USA  
David Clynes, Weatherall Institute of Molecular Medicine, Oxford, UK  
Thomas Coate, Georgetown University, USA  
Raymond Cohen, CSIRO, Australia  
Paola Costantini, University of Padova, Italy  
Ita Costello, University of Oxford, UK  
Matthew Cottee, University of Oxford, UK  
Evelyne Coudrier, Institut Curie, France  
Fraser Coxon, Bone Research Society, UK  
Julie Crockett, University of Aberdeen, UK  
Robyn Crook, University of Texas Health Science Center at Houston, USA  
Vincent Croset, University of Oxford, UK  
Colin Crump, University of Cambridge, UK  
Andrew Dacks, West Virginia University, USA  
Richard Dahl, Indiana University, USA  
Kaveh Daneshvar, Massachusetts General Hospital, Harvard Medical School, USA  
Peter Daniel, Hofstra University, USA  
Kristiaan D'Aout, University of Liverpool, UK  
Stefano De Renzi, EMBL Heidelberg, Germany  
Johan De Rooij, Hubrecht Institute, The Netherlands  
Pascal de Santa Barbara, INSERM U1046, Montpellier, France  
Jean-Luc Desseyn, Université de Lille, France  
Julie Donaldson, NIH, Bethesda, USA  
Mary Donohoe, Cornell University, USA  
Cynthia Downs, University of Nevada Reno, USA  
Dennis Drescher, Wayne State University, USA  
Jeffrey Eales, University of Manitoba, Canada  
John Eggenschwiler, University of Georgia, USA  
Peter Falkingham, Royal Veterinary College, UK  
Alan Fanning, The University of North Carolina at Chapel Hill, USA  
David Fay, University of Wyoming, USA  
Brock Fenton, University of Western Ontario, Canada  
Rafael Fissore, University of Massachusetts, USA  
Ann Foley, Clemson University College of Engineering, USA  
Eric Folker, Boston College, USA  
Caroline Formstone, Kings College London, UK  
Amelie Fradet-Turcotte, The Lunenfeld-Tanenbaum Research Institute, Mount Sinai Hospital, Toronto, Canada  
Diego Franco, University of Jaén, Spain  
Alison Frand, David Geffen School of Medicine at UCLA, USA  
Vanessa Franssens, KU Leuven, Belgium  
Mariella Freitas, University of Viçosa, Brazil  
Thomas Friedman, NIDCD, National Institutes of Health, Bethesda, USA  
Mark Frye, University of California, Los Angeles, USA  
Christopher Fulton, Australian National University, Australia  
Antonella Galli, Wellcome Trust Sanger Institute, UK  
Brigitte Galliot, University of Geneva, Switzerland  
Deborah Galson, University of Pittsburgh, USA  
Michael Garcia, University of Missouri-Columbia, USA  
Alexis Gautreau, École Polytechnique, France  
Elizabeth Gavis, Princeton University, USA  
Charles Gerday, University of Liege, Belgium  
Troy Ghashghaei, North Carolina State University, USA  
Marta Giacomello, Dulbecco-Telethon Institute, Italy  
Allen Gibbs, University of Nevada, USA  
Gary Gillis, Mount Holyoke College, USA  
Fernando Giraldez, Universitat Pompeu Fabra, Spain  
Mary Goll, Memorial Sloan Kettering Cancer Center, USA  
Sonia González-Braojos, Museo Nacional de Ciencias Naturales, Madrid, Spain  
Andrew Grierson, University of Sheffield, UK

- Atan Gross, Weizmann Institute of Science, Israel  
Francois Guillemot, National Institute for Medical Research, UK  
Monika Gullerova, University of Oxford, UK  
Ufuk Günesdogan, University of Cambridge, UK  
Marina Guvakova, University of Pennsylvania, USA  
Randal Halfmann, University of Texas Southwestern Medical Center, USA  
Chrissy Hammond, University of Bristol, UK  
Steven Hann, Vanderbilt-Ingram Cancer Center, USA  
Jeffrey Harrison, University of Florida, USA  
Volker Hartenstein, UCLA, USA  
Simon Harvey, Canterbury Christ Church University, UK  
Adrian Harwood, UCL, UK  
Philip Hastings, Baylor College of Medicine, USA  
Harry Heijnen, University Medical Center Utrecht, The Netherlands  
Ian Henderson, University of Cambridge, UK  
Brian Hendrich, University of Cambridge, UK  
Clarissa Henry, University of Maine, USA  
Ian Hickson, University of Copenhagen, Denmark  
Helfrid Hochegger, University of Sussex, UK  
Peter Hohenstein, MRC Human Genetics Unit, UK  
Georg Hollander, University of Oxford, UK  
Edmund Hollis, UCSD, USA  
Pamela Hoodless, BC Cancer Agency, Canada  
Sevan Hopyan, The Hospital for Sick Children, Toronto, Canada  
Dan Hultmark, Umeå University, Sweden  
Peter Hurd, University of Alberta, Canada  
Richard Hynes, HHMI/MIT, USA  
Hiroshi Imai, Kyoto University, Japan  
Luisa Iruela-Arispe, UCLA, USA  
John Isanhart, US Department of the Interior, USA  
Shoko Ishibashi, University of Manchester, UK  
Yoshifumi Itoh, University of Oxford, UK  
Aymelt Itzen, Technische Universität München, Germany  
Juan Carlos Izpisua Belmonte, Salk Institute, USA  
Catherine Jackson, Institut Jacques Monod, CNRS, France  
Abhinav Jain, MD Anderson Cancer Center, USA  
Jorgen Jensen, Norwegian School of Sport Sciences, Oslo, Norway  
Renjie Jiao, Institute of Biophysics, Chinese Academy of Sciences, China  
Mats Johansson, University of Wisconsin, USA  
Reid Johnson, University of California, USA  
Marko Kaksonen, EMBL Heidelberg, Germany  
David Kang, USF Health Byrd Alzheimer's Institute, USA  
Laurent Keller, University of Lausanne, Switzerland  
Steven Kelly, University of Oxford, UK  
Anna-Marie Kenney, Emory University, USA  
Yoshiaki Kikkawa, Tokyo Metropolitan Institute of Medical Science, Japan  
Dennis Kim, MIT, USA  
Chungho Kim, Korea University, Republic of Korea  
James Konopka, Stony Brook University, USA  
Edward Korn, NHLBI, NIH, USA  
Vladimir Korzh, Institute of Molecular and Cell Biology, Singapore  
Helmut Kramer, University of Texas Southwestern Medical Center, USA  
Scott Kreher, Dominican University, USA  
Torsten Kristensen, Aalborg University, Denmark  
Ronald Kroger, Lund University, Sweden  
Paul Kulesa, Stowers Institute for Medical Research, USA  
Diana Laird, UCSF, USA  
Pavithra Lakshminarasimhan, University of Cambridge, UK  
Fredrik Lanner, Karolinska Institutet, Sweden  
Michael Lanzer, Heidelberg University Hospital, Germany  
Miguel Leal, Universidade de Aveiro, Portugal  
Jae Lee, University of Miami, USA  
Heon-Jin Lee, Kyungpook National University, Republic of Korea  
Emilie Legue, Yale University, USA  
Jinxing Lin, Institute of Botany, Chinese Academy of Sciences, China  
Ji-Long Liu, MRC Functional Genomics Unit, University of Oxford, UK  
Na Liu, Nankai University, China  
Ying Liu, University of Texas Health Science Center at Houston, USA  
Aimin Liu, Penn State University, USA  
Catherine Lohmann, University of North Carolina, USA  
Martin Lowe, University of Manchester, UK  
Sally Lowell, University of Edinburgh, UK  
Laura Machesky, CRUK Beatson Institute for Cancer Research, Glasgow, UK  
Yusuke Maeda, Osaka University, Japan  
Eamonn Mallon, University of Leicester, UK  
Marcos Malumbres, Centro Nacional de Investigaciones Oncologicas, Madrid, Spain  
Ivan Manzini, University of Göttingen, Germany  
Giancarlo Marra, University of Zurich, Switzerland  
Jennifer Mather, University of Lethbridge, Alberta, Canada  
Ivan Matic, U1001 INSERM, France  
Michiyuki Matsuda, Kyoto University, Japan  
Takeshi Matsuzawa, Osaka Prefecture University, Japan  
Heidi McBride, McGill University, Canada  
David McClay, Duke University, USA  
Mark McNiven, Mayo Clinic, USA  
Irene Miguel-Aliaga, Imperial College London, UK  
Thomas Millard, University of Manchester, UK  
Laura Miller, University of North Carolina - Chapel Hill, USA  
Lucile Miquerol, Aix-Marseille University, CNRS UMR 7288, France  
Toshihiro Mitaka, Sapporo Medical University School of Medicine, Japan  
Christian Mitri, Institut Pasteur, France  
Miguel Moreno-Garcia, Colorado State University, USA  
Ciaran Morrison, National University of Ireland, Galway, Ireland  
Scott Moye-Rowley, University of Iowa, USA  
Hans-Arno Muller, University of Dundee, UK  
Daniel Mulvihill, University of Kent, UK  
Jan Munch, Ulm University Hospital, Germany  
Silvia Munoz-Descalzo, University of Bath, UK  
Sean Munro, MRC Laboratory of Molecular Biology, Cambridge, UK  
Nagy Nandor, Semmelweis University, Budapest, Hungary  
Anthony Nicholas, University of Alabama School of Medicine, USA  
Jennifer Nichols, University of Cambridge, UK  
Ben Nichols, MRC Laboratory of Molecular Biology, Cambridge, UK  
Roland Nitschke, Life Imaging Center, Freiburg, Germany

- Ryusuke Niwa, University of Tsukuba, Japan  
Wataru Nomura, Tokyo Medical and Dental University, Japan  
Akinao Nose, University of Tokyo, Japan  
Scott Nowak, Kennesaw State University, USA  
Sonja Nowotschin, Memorial Sloan-Kettering Cancer Center, USA  
Niels Ortenblad, University of Southern Denmark, Denmark  
James Palis, University of Rochester Medical Center, USA  
Yale Passamaneck, University of Hawaii, USA  
Andrew Peden, University of Sheffield, UK  
Giuseppa Pennetta, University of Edinburgh, UK  
Jonathan Pettitt, University of Aberdeen, UK  
Cathie Pflieger, Mount Sinai School of Medicine, USA  
Anna Philpott, University of Cambridge, UK  
Jonathon Pines, University of Cambridge, UK  
Nicolas Pollet, ISSB, CRI CNRS, France  
Yekaterina Poloz, University of Toronto, Canada  
Herman Pontzer, Hunter College, USA  
Jean Potvin, Saint Louis University, USA  
Rytis Prekeris, University of Colorado Health Sciences Center, USA  
John Presley, University of Montreal, Canada  
Victoria Prince, University of Chicago, USA  
Ruben Quintana-Cabrera, University of Padova, Italy  
R Raijmakers, University of Utrecht, The Netherlands  
Amy Ralston, Michigan State University, USA  
V Krishnan Ramanujan, Cedars-Sinai Medical Center, USA  
Mary Ramsey, University of Texas, USA  
Roberto Refinetti, University of South Carolina, USA  
Evan Reid, Cambridge Institute for Medical Research, UK  
Heinrich Reinchert, University of Basel, Switzerland  
Victor Rizzo, Temple University School of Medicine, USA  
Hugh Robertson, University of Illinois at Urbana-Champaign, USA  
Tristan Rodriguez, MRC Clinical Sciences Centre, Imperial College London, UK  
Shai Sabbah, Brown University, USA  
Alvaro Sagasti, UCLA, USA  
Aki Salo, University of Bath, UK  
Emilio Salo, Universitat de Barcelona, Spain  
Ramkumar Sambasivan, inStem, India  
Lisa Sandell, University of Louisville, USA  
Pauline Schaap, University of Dundee, UK  
Michael Schaller, West Virginia University, USA  
Andreas Schedl, Institute of Biology Valrose, France  
Richard Sherwood, Brigham and Women's Hospital, USA  
Yun-Bo Shi, NICHD/NIH, Bethesda, USA  
Thierry Soldati, University of Geneva, Switzerland  
Maria Eugenia Soriano, Dulbecco Telethon Institute, Italy  
Shankar Srinivas, University of Oxford, UK  
Michelle Starz-Gaiano, University of Maryland, USA  
Michelle Staudinger, University of Massachusetts, USA  
Jared Sternecker, Max Planck Institute for Molecular Biomedicine, Germany  
Angelika Stollewerk, Queen Mary University of London, UK  
Wenjing Su, Memorial Sloan-Kettering Cancer Center, USA  
Christine Suetterlin, University of California-Irvine, USA  
Melanie Sutton-McDowall, University of Adelaide, Australia  
Tohru Suzuki, Tohoku University, Japan  
Markus Tamas, University of Gothenburg, Sweden  
Kayoko Tanaka, University of Leicester, UK  
Andrea Tedeschi, German Center for Neurodegenerative Diseases, Germany  
William Theurkauf, University of Massachusetts Medical School, USA  
Ulrich Thomas, Leibniz Institute for Neurobiology, Germany  
Ryan Thummel, Wayne State University, USA  
Andrzej Tkacz, University of Oxford, UK  
Sokol Todi, Wayne State University, USA  
Stan Tomavo, Université Lille Nord de France, France  
Mark Tomishima, Memorial Sloan Kettering Cancer Center, USA  
Michael Tomlinson, University of Birmingham, UK  
Pranav Ullal, University of Lausanne, Switzerland  
Teresa Valencak, Veterinary University Vienna, Austria  
Mark van Breugel, MRC Laboratory of Molecular Biology, Cambridge, UK  
Anne Marijn van der Graaf, University of Groningen, The Netherlands  
Chris van der Poel, La Trobe University, Australia  
Frans van Roy, Ghent University, Belgium  
Alexander Venn, Centre Scientifique de Monaco, Monaco  
Monica Vetter, University of Utah, USA  
Andrea Vortkamp, Max Planck Institute for Developmental Biology, Germany  
Stephen Voss, University of Kentucky, USA  
James Wakefield, University of Exeter, UK  
Yibin Wang, UCLA, USA  
Xiaoxi Wang, Vanderbilt University, USA  
Hongyan Wang, Duke-NUS Graduate Medical School, Singapore  
Steven Wasserman, UCSD, USA  
Thomas Wassmer, Aston University, UK  
Thomas Wellems, NIAID, NIH, USA  
Michael White, University of South Florida, USA  
Jill Wildonger, University of Wisconsin-Madison, USA  
Bodo Wilts, University of Fribourg, Switzerland  
Richard Wingate, King's College London, UK  
Thomas Woolley, University of Oxford, UK  
Christopher Wright, Vanderbilt University, USA  
Wei-Feng Xue, University of Kent, UK  
Zhe Yang, Wayne State University, USA  
Seda Yerlikaya, University of Geneva, Switzerland  
Hebao Yuan, University of Michigan, USA  
Troy Zars, University of Missouri-Columbia, USA  
Bing Zhang, University of Missouri, USA  
Hong-Bo Zhao, University of Kentucky Medical Center, USA  
Hui Zhao, The Chinese University of Hong Kong, Hong Kong  
Irene Zohn, Children's National Medical Center, USA  
Olivier Zugasti, Centre d'Immunologie de Marseille-Luminy, France
